# Supplementary material for: Occurrence and trophic transfer of nanoparticulate Ag and Ti in the natural aquatic food web of Taihu Lake, China
Source: Royal Society of Chemistry journal article supplement (doi:10.1039/c9en00797k), 2019-01-01
Supplement: c9en00797k1.pdf [file c9en00797k1.pdf]

## Supporting Information

Occurrence and trophic transfer of nanoparticulate Ag and Ti in the  
natural aquatic food web of Taihu Lake, China

Bowen Xiao<sup>1</sup>, Yinqing Zhang<sup>1</sup>, Xiaolei Wang<sup>1</sup>, Meng Chen<sup>1</sup>, Binbin Sun<sup>1</sup>, Tong  
Zhang\*<sup>1</sup>, Lingyan Zhu\*<sup>1</sup>

*1. College of Environmental Science and Engineering, Ministry of Education Key*

*Laboratory of Pollution Processes and Environmental Criteria, Tianjin Key*

*Laboratory of Environmental Remediation and Pollution Control, Nankai University,*

*38 Tongyan Rd., Tianjin 300350, China*

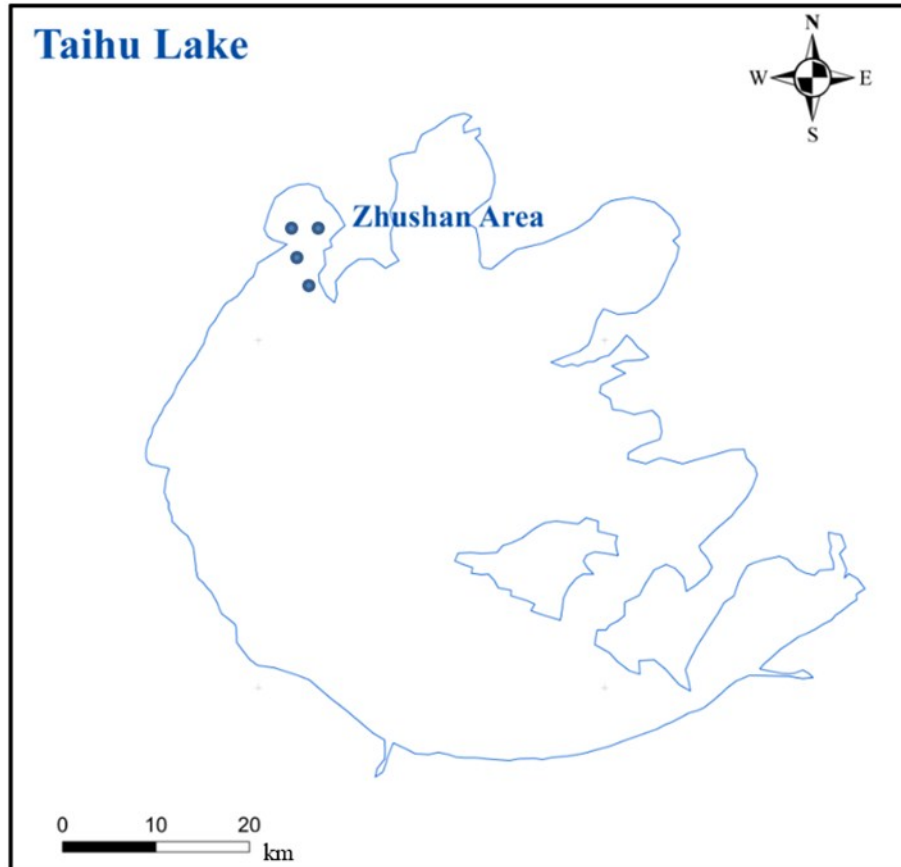

**Fig. S1.** Sampling sites of surface water and sediment in Zhushan bay of Taihu Lake, China.

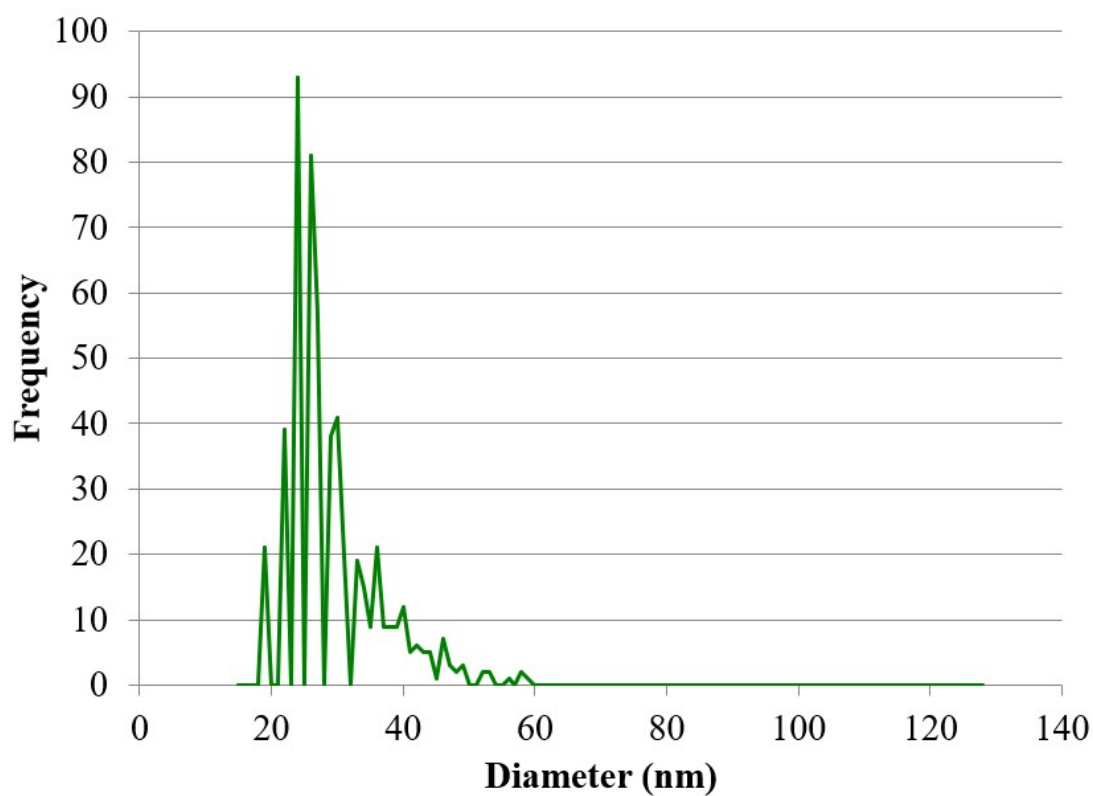

Fig. S2. Size distribution of nanoparticulate Ag in surface water of Taihu Lake, China.

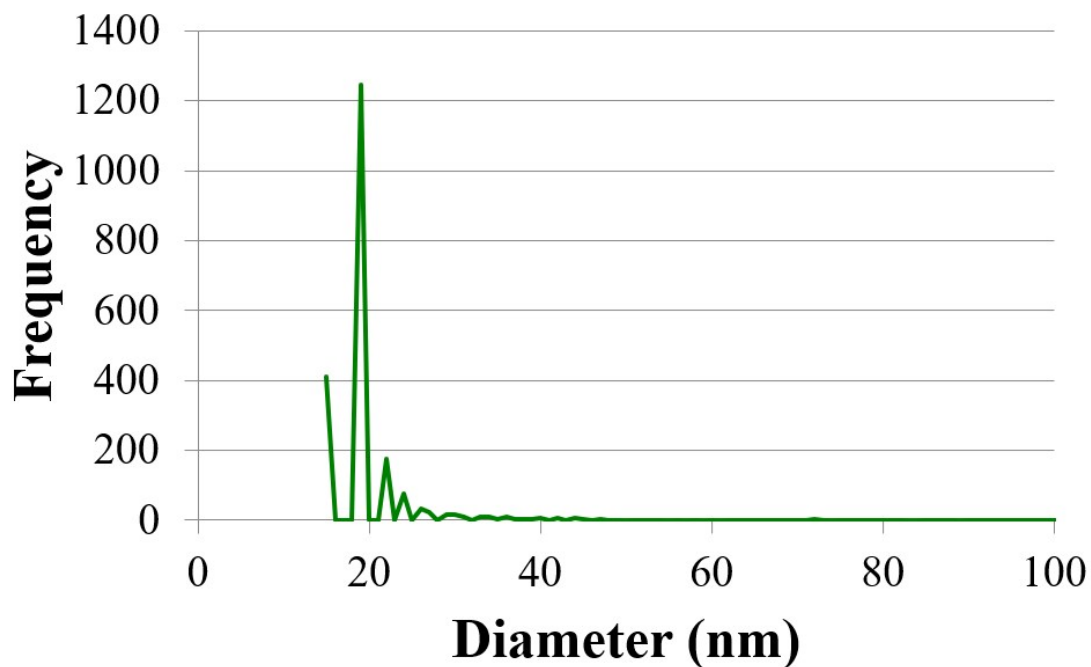

Fig. S3. Size distribution of nanoparticulate Ag in sediment of Taihu Lake, China.

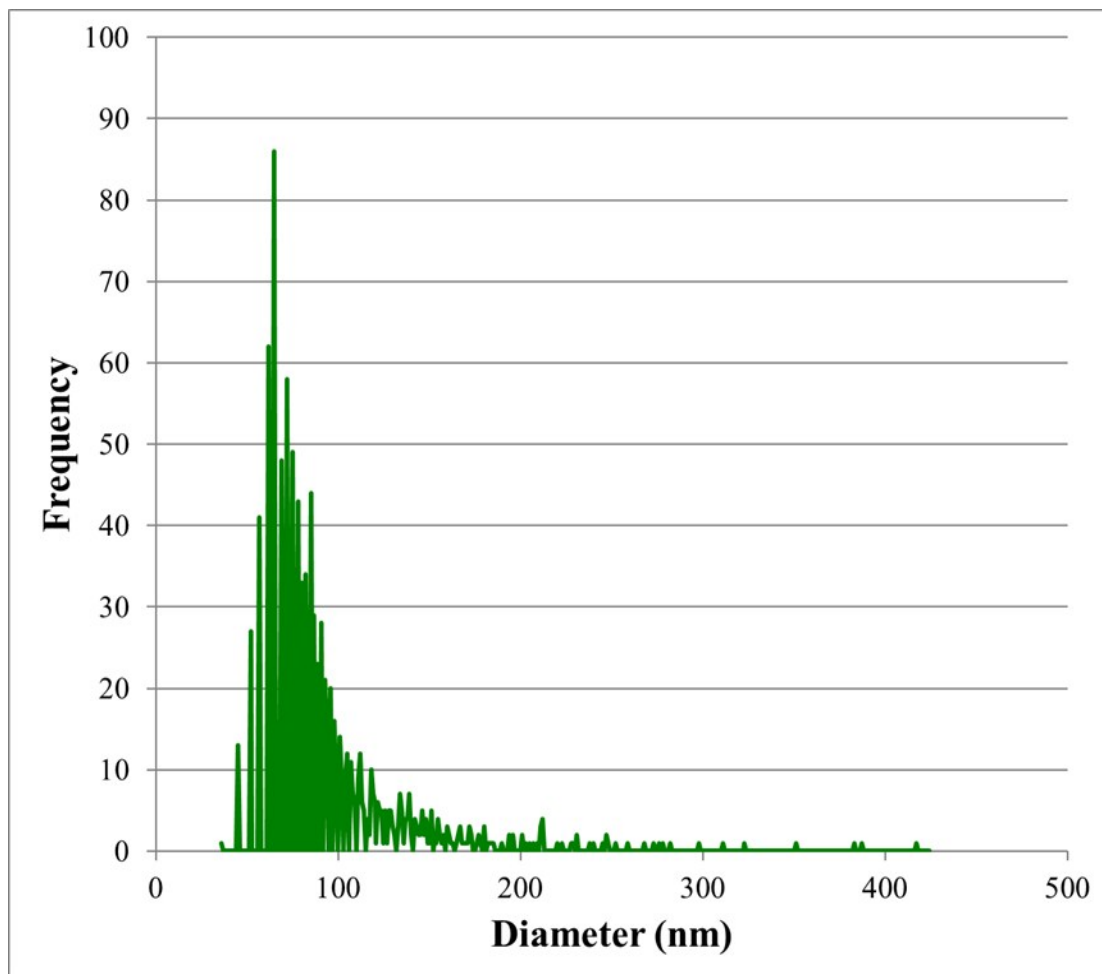

**Fig. S4.** Size distribution of nanoparticulate Ti in surface water of Taihu Lake, China.

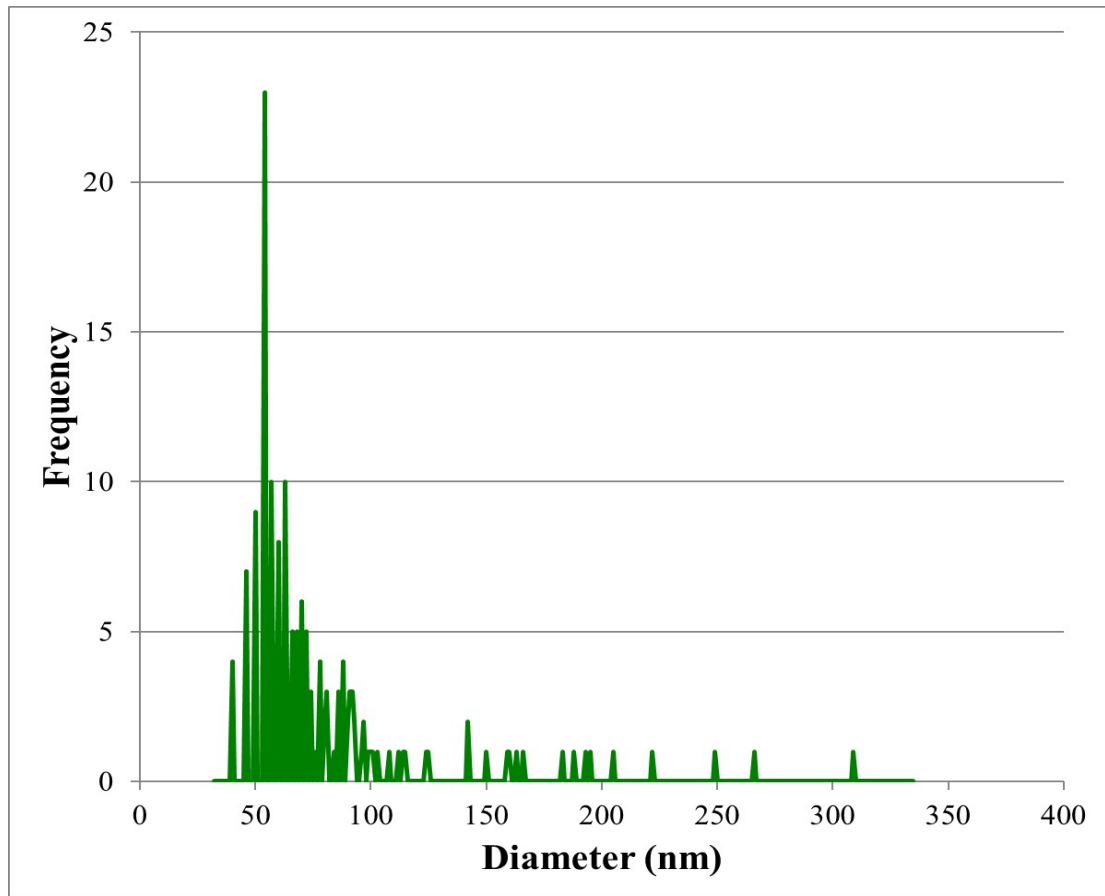

**Fig. S5.** Size distribution of nanoparticulate Ti in sediment of Taihu Lake, China.

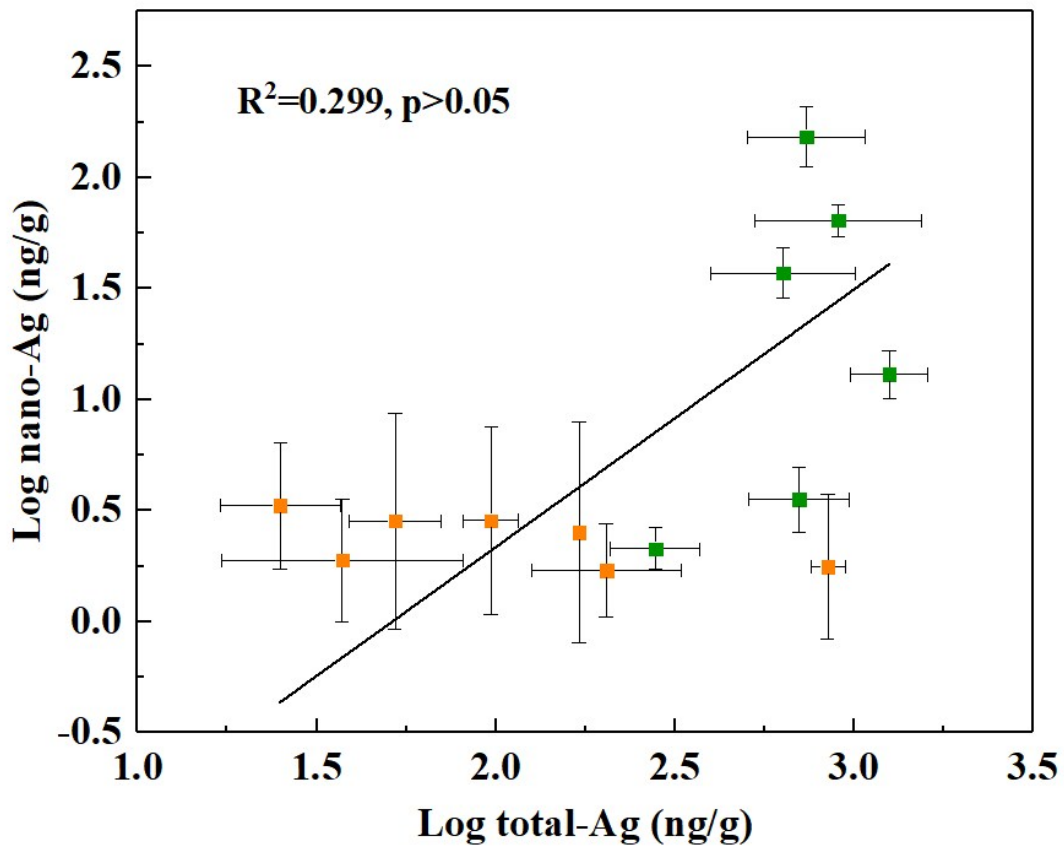

**Fig. S6.** Correlations between log concentrations of total-Ag and nano-Ag in aquatic organisms. Invertebrate and fish samples were represented by green and orange color symbols, respectively. Error bars represented standard error of replicate samples (n=3).

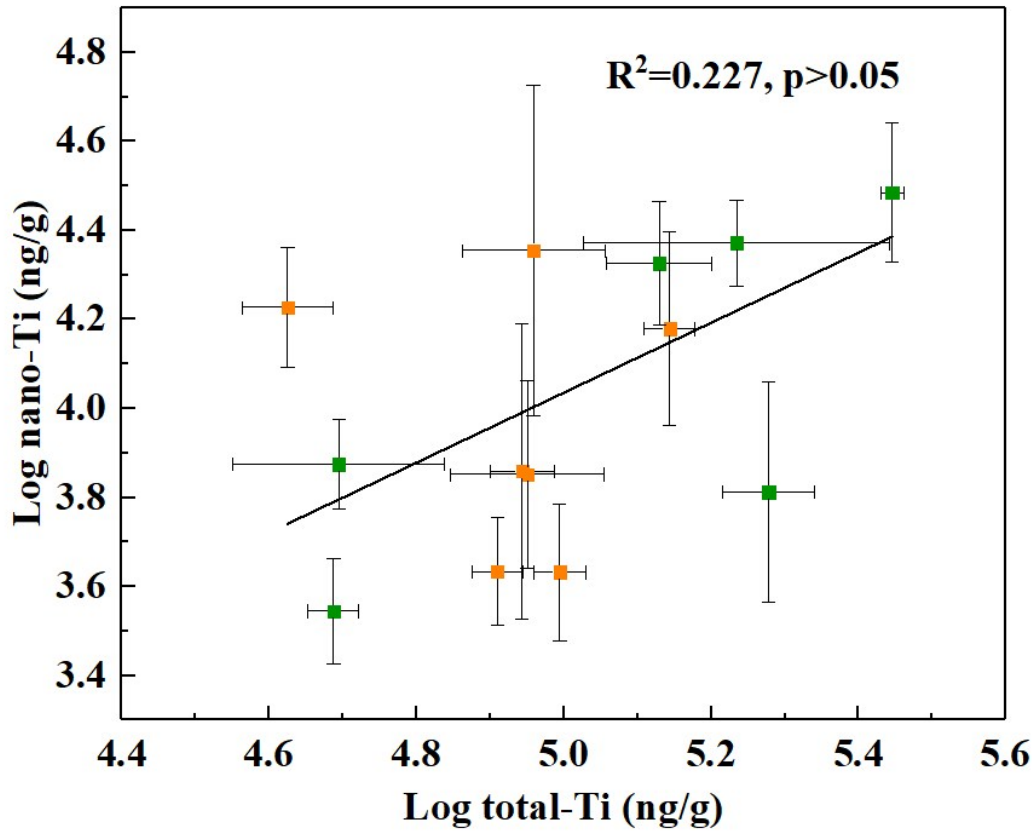

**Fig. S7.** Correlations between log concentrations of total-Ti and nano-Ti in aquatic organisms. Invertebrate and fish samples were represented by green and orange color symbols, respectively. Error bars represented standard error of replicate samples (n=3).

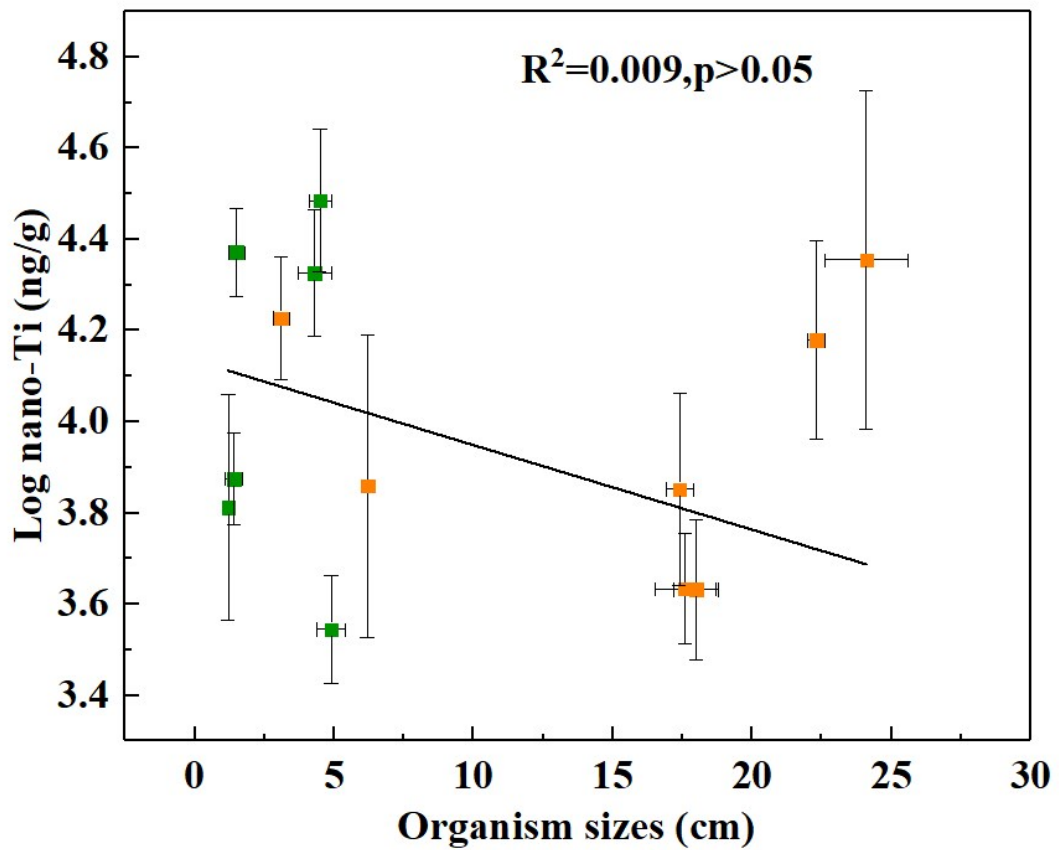

**Fig. S8.** Correlations between organism sizes and log concentrations of nano-Ti in aquatic organisms. Invertebrate and fish samples were represented by green and orange color symbols, respectively. Error bars represented standard error of replicate samples (n=3).



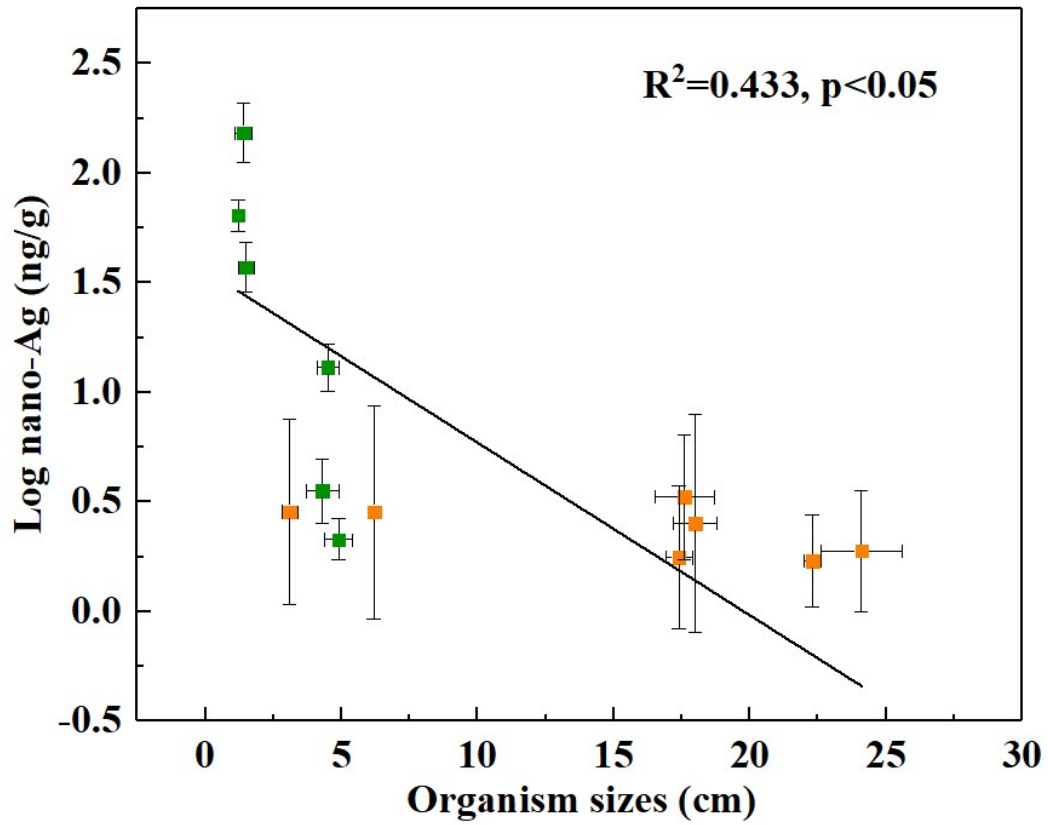

**Fig. S9.** Correlations between organism sizes and log concentrations of nano-Ag in aquatic organisms. Invertebrate and fish samples were represented by green and orange color symbols, respectively. Error bars represented standard error of replicate samples (n=3).

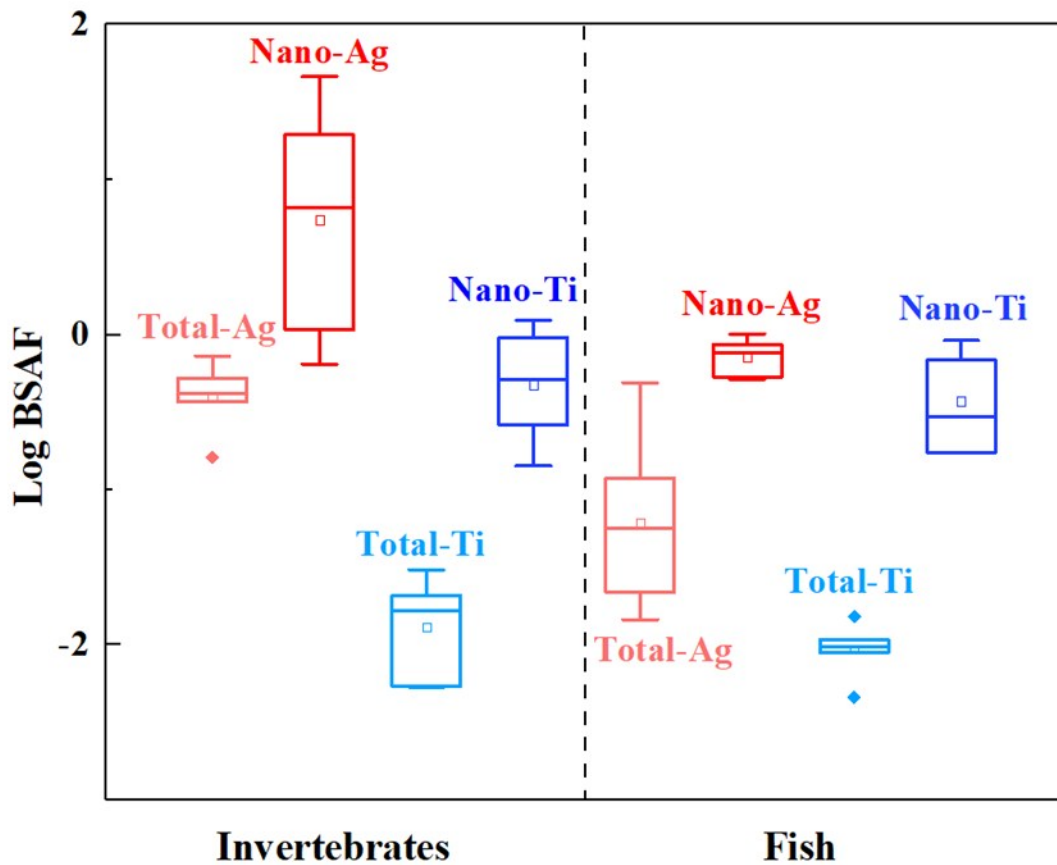

**Fig. S10.** Log BSAF of total and nanoparticulate Ag and Ti in aquatic organisms. Invertebrates were placed on the left-hand side of the dotted line, and fish samples were placed on the right-hand side of the dotted line. The horizontal line in the box represents the median values. Hollow points represent average values. Solid points represent outliers. The lower and upper ends of the boxes display the 25th and 75th percentiles.
